# Supplementary material for: SegCorr a statistical procedure for the detection of genomic regions of correlated expression
Source: PubMed Central journal article supplement (PMC5504623; doi:10.1186/s12859-017-1742-5), 2017-07-11
Supplement: 12859_2017_1742_MOESM1_ESM.pdf [file 12859_2017_1742_MOESM1_ESM.pdf]

## Other methods

| Method     | Requires<br>exogeneous data | Available /<br>maintained | Optimization<br>algorithm |
|------------|-----------------------------|---------------------------|---------------------------|
| Rendersome | yes                         | –                         | –                         |
| DIGMAP     | yes                         | –                         | –                         |
| REEF       | yes                         | –                         | –                         |
| CluGene    | no                          | no                        | heuristic                 |
| G-NEST     | no                          | no                        | heuristic                 |
| TCM        | no                          | yes                       | heuristic                 |
| SegCorr    | no                          | yes                       | exact                     |

Table 1: Comparison of several methods accounting for local correlation of gene expression. The last two columns are not filled for the first 3 methods (Rendersome, DIGMAP, REEF) because they pursue a purpose different from the one of SegCorr.

## Proof of Lemma 1

Throughout this proof, we drop index  $k$  for sake of clarity. For a region with length  $p_0$ , the covariance matrix  $\Sigma$  in Equation (1) can be rewritten as:

$$\Sigma = (1 - \rho)I + \rho J$$

where  $I$  stand for the  $p_0 \times p_0$  identity matrix and  $J$  for the  $p_0 \times p_0$  matrix with all entries equal to one. The inverse of this matrix has the form  $\Sigma^{-1} = aI + bJ$  where

$$a = \frac{1}{1 - \rho}, \quad b = -\frac{\rho}{(1 - \rho)[1 - \rho + p_0\rho]}.$$

The determinant of  $\Sigma$  is

$$|\Sigma| = (1 - \rho)^{p_0-1}(1 - \rho + p_0\rho)$$

and the trace term  $\text{tr}[Y\Sigma^{-1}(Y)^\top]$  in Equation (4) yields

$$\text{tr}(Y(aI + bJ)Y^\top) = anp_0 + bn \sum_{j=1}^{p_0} \sum_{k=1}^{p_0} \hat{G}_{jk}.$$

Combining all the above gives the log-likelihood for this region:

$$\begin{aligned} -2 \log \mathcal{L} &= n [\log(1 - \rho + p_0\rho) + (p_0 - 1) \log(1 - \rho)] \\ &\quad + \frac{np_0}{1 - \rho} - \frac{\rho n \sum_j^{p_0} \sum_k^{p_0} \hat{G}_{jk}}{(1 - \rho)[1 - \rho + p_0\rho]}. \end{aligned}$$

Optimizing this function wrt  $\rho$  gives the formula of the MLE (7). Plugging this estimate into the same function gives the contrast function given in (8).

### Distribution of the test statistic

Note  $Y_i^{(k)} = (Y_{i, \tau_{k-1}+1}, \dots, Y_{i, \tau_k})^T$ . Using the same notations as in Section 3, one has

$$Y_i^{(k)} \sim \mathcal{N}(0, \Sigma_k) \quad \Rightarrow \quad Y_{i\bullet}^{(k)} \sim \mathcal{N}\left(0, \frac{1 + (p_k - 1)\rho_k}{p_k}\right)$$

Because variables  $Y_i^{(k)}$ ,  $i = 1, \dots, n$  are i.i.d so do variables  $Y_{i\bullet}^{(k)}$ , and consequently

$$\sum_i^n \left( Y_{i\bullet}^{(k)} - Y_{\bullet\bullet}^{(k)} \right)^2 \sim \frac{1 + (p_k - 1)\rho_k}{p_k} \chi_{n-1}^2.$$
